# Supplementary material for: Effect of 24-Week, Late-Evening Ingestion of a Calcium-Fortified, Milk-Based Protein Matrix on Biomarkers of Bone Metabolism and Site-Specific Bone Mineral Density in Postmenopausal Women with Osteopenia
Source: MDPI journal article supplement (doi:10.3390/nu14173486), 2022-08-24
Supplement: s1 [file s1]

**Supplementary Table S1.** Mass and nutrient composition of CON matched for nutrient energy provided by MBPM

**Vanilla Flavoured Maltodextrin (CONTROL)**

| Subject ID | Body mass (kg) | Supplement mass (g) | Energy (kcal·kg <sup>-1</sup> ) | Protein (g·kg <sup>-1</sup> ) | Carbohydrate (g·kg <sup>-1</sup> ) | Fat (g) | Calcium (mg) | Vitamin D (ug) |
|------------|----------------|---------------------|---------------------------------|-------------------------------|------------------------------------|---------|--------------|----------------|
| CON1       | 76.0           | 52.1                | 3                               | N/A                           | 0.65                               | N/A     | N/A          | N/A            |
| CON2       | 58.0           | 33.2                | 2                               | N/A                           | 0.54                               | N/A     | N/A          | N/A            |
| CON3       | 86.3           | 52.1                | 2                               | N/A                           | 0.57                               | N/A     | N/A          | N/A            |
| CON4       | 88.0           | 52.1                | 2                               | N/A                           | 0.56                               | N/A     | N/A          | N/A            |
| CON5       | 72.7           | 42.6                | 2                               | N/A                           | 0.56                               | N/A     | N/A          | N/A            |
| CON6       | 78.0           | 52.1                | 3                               | N/A                           | 0.63                               | N/A     | N/A          | N/A            |
| CON7       | 68.3           | 42.6                | 2                               | N/A                           | 0.59                               | N/A     | N/A          | N/A            |
| CON8       | 54.9           | 33.2                | 2                               | N/A                           | 0.57                               | N/A     | N/A          | N/A            |
| CON9       | 73.0           | 42.6                | 2                               | N/A                           | 0.55                               | N/A     | N/A          | N/A            |
| CON10      | 84.4           | 52.1                | 2                               | N/A                           | 0.59                               | N/A     | N/A          | N/A            |
| CON11      | 74.8           | 42.6                | 2                               | N/A                           | 0.54                               | N/A     | N/A          | N/A            |
| CON12      | 68.6           | 42.6                | 2                               | N/A                           | 0.59                               | N/A     | N/A          | N/A            |
| CON13      | 63.5           | 42.6                | 3                               | N/A                           | 0.64                               | N/A     | N/A          | N/A            |
| CON14      | 58.4           | 33.2                | 2                               | N/A                           | 0.54                               | N/A     | N/A          | N/A            |
| CON15      | 66.8           | 42.6                | 2                               | N/A                           | 0.61                               | N/A     | N/A          | N/A            |
| CON16      | 53.8           | 33.2                | 2                               | N/A                           | 0.59                               | N/A     | N/A          | N/A            |
| CON17      | 70.2           | 42.6                | 2                               | N/A                           | 0.58                               | N/A     | N/A          | N/A            |
| CON18      | 71.2           | 42.6                | 2                               | N/A                           | 0.57                               | N/A     | N/A          | N/A            |
| CON19      | 113.1          | 61.6                | 2                               | N/A                           | 0.52                               | N/A     | N/A          | N/A            |
| CON20      | 76.6           | 52.1                | 3                               | N/A                           | 0.65                               | N/A     | N/A          | N/A            |
| CON21      | 59.6           | 33.2                | 2                               | N/A                           | 0.53                               | N/A     | N/A          | N/A            |
| CON22      | 53.5           | 33.2                | 2                               | N/A                           | 0.59                               | N/A     | N/A          | N/A            |
| CON23      | 61.5           | 42.6                | 3                               | N/A                           | 0.66                               | N/A     | N/A          | N/A            |
| CON24      | 55.9           | 33.2                | 2                               | N/A                           | 0.56                               | N/A     | N/A          | N/A            |
| CON25      | 72.6           | 42.6                | 2                               | N/A                           | 0.56                               | N/A     | N/A          | N/A            |
| CON26      | 61.2           | 42.6                | 3                               | N/A                           | 0.66                               | N/A     | N/A          | N/A            |
| CON27      | 58.6           | 33.2                | 2                               | N/A                           | 0.54                               | N/A     | N/A          | N/A            |
| CON28      | 66.5           | 42.6                | 2                               | N/A                           | 0.61                               | N/A     | N/A          | N/A            |
| CON29      | 63.6           | 42.6                | 3                               | N/A                           | 0.64                               | N/A     | N/A          | N/A            |
| CON30      | 63.6           | 42.6                | 3                               | N/A                           | 0.64                               | N/A     | N/A          | N/A            |
| CON31      | 87.6           | 52.1                | 2                               | N/A                           | 0.57                               | N/A     | N/A          | N/A            |
| CON32      | 72.3           | 42.6                | 2                               | N/A                           | 0.56                               | N/A     | N/A          | N/A            |
| CON33      | 101.0          | 61.6                | 2                               | N/A                           | 0.58                               | N/A     | N/A          | N/A            |
| CON34      | 67.8           | 42.6                | 2                               | N/A                           | 0.60                               | N/A     | N/A          | N/A            |
| CON35      | 72.8           | 42.6                | 2                               | N/A                           | 0.56                               | N/A     | N/A          | N/A            |
| Median     | 68.6           | 42.6                | 2                               | N/A                           | 0.59                               | N/A     | N/A          | N/A            |
| IQR        | 14.8           | 9.5                 | 0                               | N/A                           | 0.05                               | N/A     | N/A          | N/A            |
| Min        | 53.5           | 33.2                | 2                               | N/A                           | 0.52                               | N/A     | N/A          | N/A            |
| Max        | 113.1          | 61.6                | 3                               | N/A                           | 0.66                               | N/A     | N/A          | N/A            |

**Supplementary Table S2.** Mass and nutrient composition of MBPM providing 0.3g protein per kilogram of body mass.

**High Protein Bone Health Powder Instant and Fortified (MBPM)**

| Subject ID         | Body mass (kg) | Supplement mass (g)* | Energy (kcal·kg <sup>-1</sup> )* | Protein (g·kg <sup>-1</sup> ) | Carbohydrate (g·kg <sup>-1</sup> ) | Fat (g·kg <sup>-1</sup> ) | Calcium (mg)* | Vitamin D (ug)* |
|--------------------|----------------|----------------------|----------------------------------|-------------------------------|------------------------------------|---------------------------|---------------|-----------------|
| MBPM1              | 69.3           | 47.8                 | 2                                | 0.32                          | 0.28                               | 0                         | 880           | 1.0             |
| MBPM2              | 71.1           | 47.8                 | 2                                | 0.31                          | 0.27                               | 0                         | 880           | 1.0             |
| MBPM3              | 55.7           | 37.2                 | 2                                | 0.31                          | 0.27                               | 0                         | 684           | 0.7             |
| MBPM4              | 80.4           | 58.4                 | 3                                | 0.34                          | 0.30                               | 0                         | 1075          | 1.2             |
| MBPM5              | 59.7           | 37.2                 | 2                                | 0.29                          | 0.25                               | 0                         | 684           | 0.7             |
| MBPM6              | 68.3           | 47.8                 | 2                                | 0.33                          | 0.28                               | 0                         | 880           | 1.0             |
| MBPM7              | 54.1           | 37.2                 | 2                                | 0.32                          | 0.28                               | 0                         | 684           | 0.7             |
| MBPM8              | 68.5           | 47.8                 | 2                                | 0.33                          | 0.28                               | 0                         | 880           | 1.0             |
| MBPM9              | 82.5           | 58.4                 | 2                                | 0.33                          | 0.29                               | 0                         | 1075          | 1.2             |
| MBPM10             | 93             | 69.0                 | 3                                | 0.35                          | 0.30                               | 0                         | 1270          | 1.4             |
| MBPM11             | 54.2           | 37.2                 | 2                                | 0.32                          | 0.28                               | 0                         | 684           | 0.7             |
| MBPM12             | 60.7           | 47.8                 | 3                                | 0.37                          | 0.32                               | 0                         | 880           | 1.0             |
| MBPM13             | 96.3           | 69.0                 | 3                                | 0.33                          | 0.29                               | 0                         | 1270          | 1.4             |
| MBPM14             | 74.6           | 47.8                 | 2                                | 0.30                          | 0.26                               | 0                         | 880           | 1.0             |
| MBPM15             | 48.2           | 37.2                 | 3                                | 0.36                          | 0.31                               | 0                         | 684           | 0.7             |
| MBPM16             | 83.7           | 58.4                 | 2                                | 0.33                          | 0.28                               | 0                         | 1075          | 1.2             |
| MBPM17             | 72.5           | 47.8                 | 2                                | 0.31                          | 0.27                               | 0                         | 880           | 1.0             |
| MBPM18             | 63.5           | 47.8                 | 3                                | 0.35                          | 0.31                               | 0                         | 880           | 1.0             |
| MBPM19             | 77             | 58.4                 | 3                                | 0.35                          | 0.31                               | 0                         | 1075          | 1.2             |
| MBPM20             | 70             | 47.8                 | 2                                | 0.32                          | 0.28                               | 0                         | 880           | 1.0             |
| MBPM21             | 68.9           | 47.8                 | 2                                | 0.32                          | 0.28                               | 0                         | 880           | 1.0             |
| MBPM22             | 85             | 58.4                 | 2                                | 0.32                          | 0.28                               | 0                         | 1075          | 1.2             |
| MBPM23             | 62.2           | 47.8                 | 3                                | 0.36                          | 0.31                               | 0                         | 880           | 1.0             |
| MBPM24             | 58.3           | 37.2                 | 2                                | 0.30                          | 0.26                               | 0                         | 684           | 0.7             |
| MBPM25             | 62             | 47.8                 | 3                                | 0.36                          | 0.31                               | 0                         | 880           | 1.0             |
| MBPM26             | 63.8           | 47.8                 | 3                                | 0.35                          | 0.30                               | 0                         | 880           | 1.0             |
| MBPM27             | 66.3           | 47.8                 | 3                                | 0.34                          | 0.29                               | 0                         | 880           | 1.0             |
| MBPM28             | 43.8           | 37.2                 | 3                                | 0.40                          | 0.34                               | 0                         | 684           | 0.7             |
| MBPM29             | 62             | 47.8                 | 3                                | 0.36                          | 0.31                               | 0                         | 880           | 1.0             |
| MBPM30             | 66             | 47.8                 | 3                                | 0.34                          | 0.29                               | 0                         | 880           | 1.0             |
| MBPM31             | 57.7           | 37.2                 | 2                                | 0.30                          | 0.26                               | 0                         | 684           | 0.7             |
| MBPM32             | 68.2           | 47.8                 | 2                                | 0.33                          | 0.28                               | 0                         | 880           | 1.0             |
| <b>Mean/Median</b> | 67.7           | 47.8                 | 2                                | 0.33                          | 0.29                               | 0                         | 880           | 1               |
| <b>SD/IQR</b>      | 12.0           | 8.0                  | 0                                | 0.02                          | 0.02                               | 0                         | 147           | 0.2             |
| <b>Min</b>         | 43.8           | 37.2                 | 2                                | 0.29                          | 0.25                               | 0                         | 684           | 0.7             |
| <b>Max</b>         | 96.3           | 69.0                 | 3                                | 0.40                          | 0.34                               | 0                         | 1270          | 1.4             |

Note. Median ± IQR was reported for non-normally distributed variables (p < 0.05). \*-Variables non-normally distributed.
